# Supplementary material for: Duplex droplet digital PCR detection of Streptococcus uberis and Streptococcus dysgalactiae, major etiological agents of bovine mastitis
Source: Frontiers journal article supplement (doi:10.3389/fanim.2023.1336816), 2024-01-16
Supplement: Image_1.pdf [file Image_1.pdf]

Supplementary Figure 1

Download of *S. dysgalactiae* and *S. uberis* genomes from NCBI genomes database (June 2021)

Core-genome prediction by species  
Software: Roary

Comparison of Core-genomes.  
Software: tBLASTx  
(parameter: Aminoacid identity % > 30, Coverage %> 70, E-value<10<sup>5</sup>)

Searching of Unique-genes of *S. dysgalactiae* and *S. uberis* over *Streptococcus* genus  
Software: Nucleotide BLAST  
(parameter: Aminoacid identity % > 90, Coverage %> 70, E-value<10<sup>5</sup>, Filters: include “*Streptococcus*”, exclude:”*Streptococcus dysgalactiae*”, “*Streptococcus uberis*”)  
Database: NCBI genomes

Gene Marker selection and Primer design.  
Software: Primer3  
(parameter: amplification product length< 180 bp, preference nucleotide start sequence: G or C, primers length: 18-24, probe length: 30-38 bp, GC%≥50 (only primers), NCBI blast hit:only with species to primers and probe design )

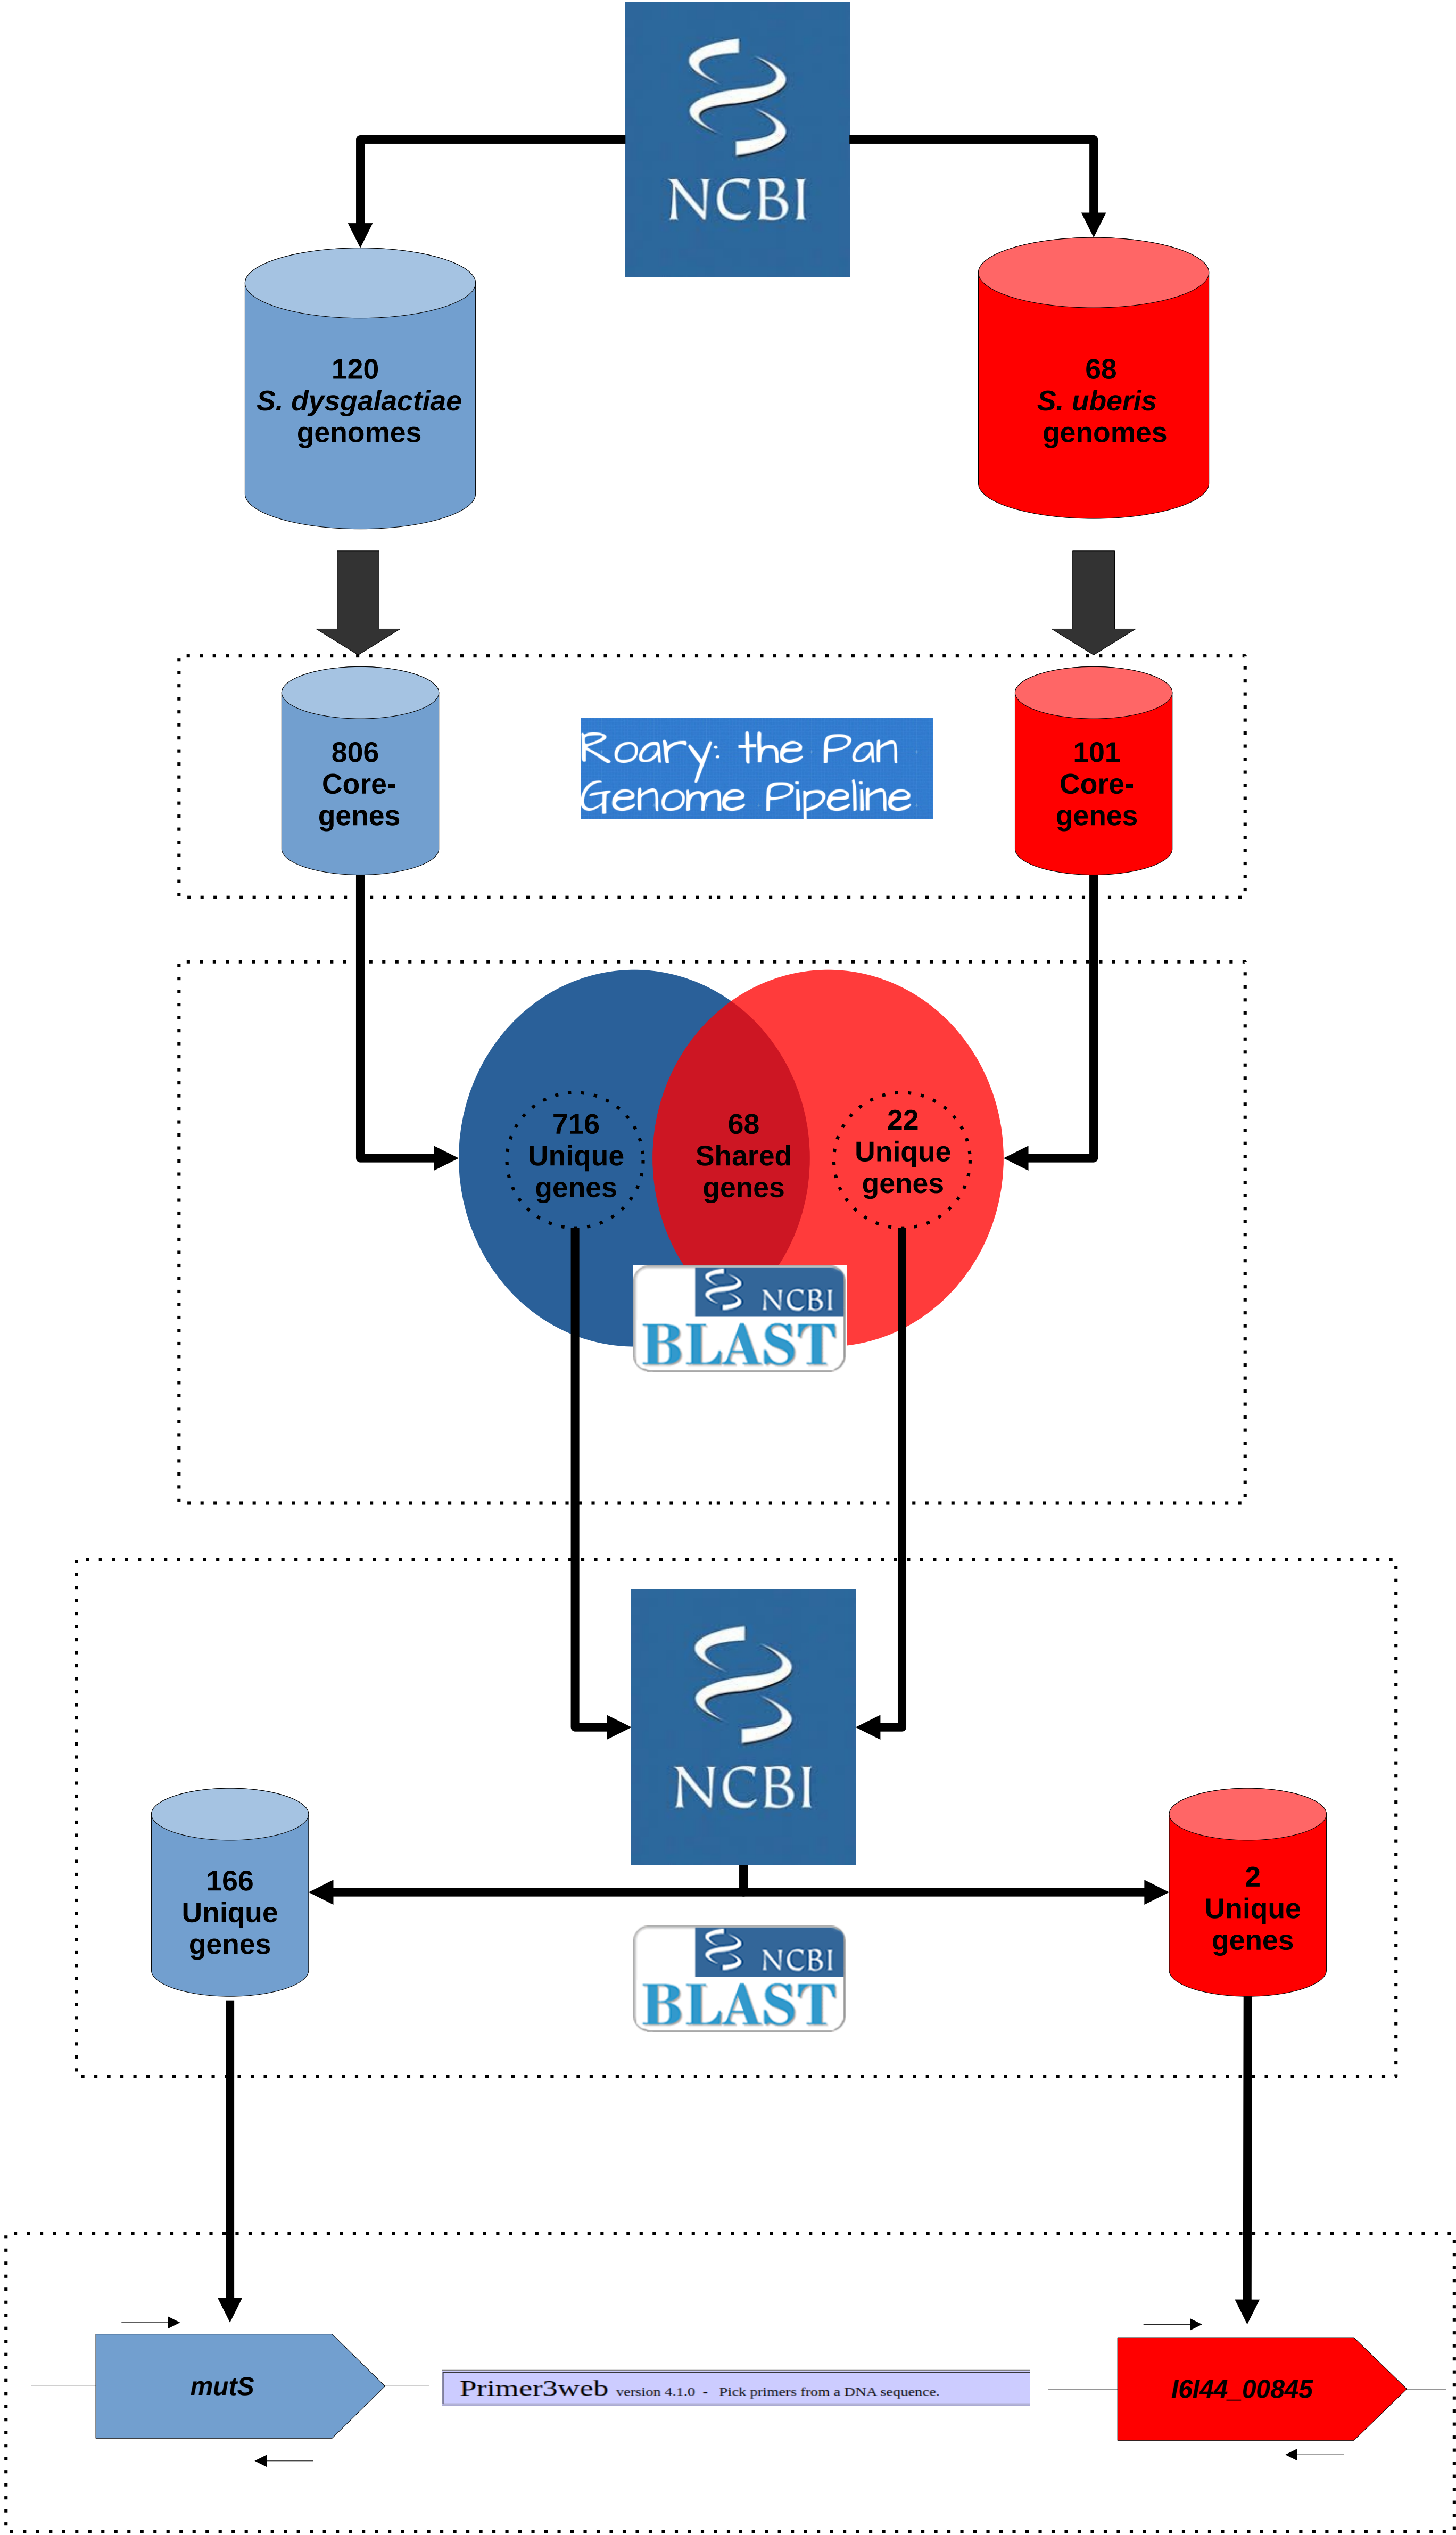

Supplementary Figure 1: Workflow for comparative genomics analysis and primers design implemented in the present study.
