# Supplementary material for: Duplex droplet digital PCR detection of Streptococcus uberis and Streptococcus dysgalactiae, major etiological agents of bovine mastitis
Source: Frontiers journal article supplement (doi:10.3389/fanim.2023.1336816), 2024-01-16
Supplement: Table_1.XLSX [file Table_1.XLSX]

## Sheet: dysgalact
Supplementary Table 1 : Genome Information – S. dysgalactiae
Strain	BioSample	BioProject	Assembly	Level	Size(Mb)	GC%	Replicons	Scaffolds	CDS
NCTC6403	SAMEA3649039	PRJEB6403	GCA_901543725.1	Complete	2.2005	39.6	chromosome 1:NZ_LR594046.1/LR594046.1	1	1967
FDAARGOS_1157	SAMN16357326	PRJNA231221	GCA_016724885.1	Complete	2.15118	39.3761	chromosome:NZ_CP068057.1/CP068057.1; plasmid unnamed1:NZ_CP068058.1/CP068058.1; plasmid unnamed2:NZ_CP068059.1/CP068059.1	3	1934
NCTC6181	SAMEA3871789	PRJEB6403	GCA_900636815.1	Complete	2.2699	39.7	chromosome 1:NZ_LR134316.1/LR134316.1	1	2045
FDAARGOS_1016	SAMN16357185	PRJNA231221	GCA_016128135.1	Complete	2.26703	39.5	chromosome:NZ_CP066073.1/CP066073.1	1	2148
NCTC6179	SAMEA3614273	PRJEB6403	GCA_900475185.1	Complete	2.2552	39.8	chromosome 1:NZ_LS483361.1/LS483361.1	1	2024
NCTC7136	SAMEA3930552	PRJEB6403	GCA_900475725.1	Complete	2.24923	39.4	chromosome 1:NZ_LS483413.1/LS483413.1	1	2081
NCTC9413	SAMEA3662921	PRJEB6403	GCA_901543615.1	Complete	2.24174	39.5	chromosome 1:NZ_LR594045.1/LR594045.1	1	2002
NCTC11554	SAMEA3662927	PRJEB6403	GCA_901543995.1	Complete	2.23328	39.5	chromosome 1:NZ_LR594047.1/LR594047.1	1	2047
FDAARGOS_654	SAMN11056369	PRJNA231221	GCA_008693725.1	Complete	2.25353	39.1459	chromosome:NZ_CP044102.1/CP044102.1; plasmid unnamed1:NZ_CP044103.1/CP044103.1; plasmid unnamed2:NZ_CP044104.1/CP044104.1	3	2046
NCTC8546	SAMEA3572421	PRJEB6403	GCA_901542365.1	Complete	2.21292	39.5	chromosome 1:NZ_LR594034.1/LR594034.1	1	1986
NCTC4669	SAMEA3539719	PRJEB6403	GCA_900635345.1	Complete	2.20189	39.2	chromosome 1:NZ_LR134094.1/LR134094.1	1	1982
NCTC11556	SAMEA3662929	PRJEB6403	GCA_901544215.1	Complete	2.19365	39.5	chromosome 1:NZ_LR594048.1/LR594048.1	1	1981
TPCH-A74	SAMN14609616	PRJNA625795	GCA_012844405.1	Complete	2.18263	39.5	chromosome:NZ_CP051624.1/CP051624.1	1	1996
TPCH-A88	SAMN14609627	PRJNA625795	GCA_013004125.1	Complete	2.18092	39.5	chromosome:NZ_CP053074.1/CP053074.1	1	1987
AC-2713	SAMEA3138428	PRJNA48119	GCA_000317855.1	Complete	2.17944	39.5	chromosome:NC_019042.1/HE858529.1	1	1939
FDAARGOS_1017	SAMN16357186	PRJNA231221	GCA_016128095.1	Complete	2.17433	39.6887	chromosome:NZ_CP066069.1/CP066069.1; plasmid unnamed:NZ_CP066070.1/CP066070.1	2	1976
NCTC9414	SAMEA3643308	PRJEB6403	GCA_900475255.1	Complete	2.16967	39.5	chromosome 1:NZ_LS483363.1/LS483363.1	1	2011
89	SAMD00238723	PRJDB10330	GCA_014192695.1	Complete	2.15861	39.4	chromosome:NZ_AP023393.1/AP023393.1	1	1950
RE378	SAMD00060962	PRJDA34711	GCA_000307185.1	Complete	2.15115	39.5	chromosome:NC_018712.1/AP011114.1	1	1870
Kdys0611	SAMD00051096	PRJDB4214	GCA_003967135.1	Complete	2.22482	39.9539	chromosome:NZ_AP018726.1/AP018726.1; plasmid pFGCSD1:NZ_AP018727.1/AP018727.1; plasmid pFGCSD2:NZ_AP018728.1/AP018728.1; plasmid pFGCSD3:NZ_AP018729.1/AP018729.1; plasmid pFGCSD4:NZ_AP018730.1/AP018730.1; plasmid pFGCSD5:NZ_AP018731.1/AP018731.1	6	1963
159	SAMD00238724	PRJDB10330	GCA_014192895.1	Complete	2.11152	39.4937	chromosome:NZ_AP023394.1/AP023394.1; plasmid pSDSE159:NZ_AP023395.1/AP023395.1	2	1910
GGS_124	SAMD00060937	PRJDA27849	GCA_000010705.1	Complete	2.10634	39.6	chromosome 1:NC_012891.1/AP010935.1	1	1938
NCTC5371	SAMEA3649038	PRJEB6403	GCA_900475145.1	Complete	2.10376	39.6	chromosome 1:NZ_LS483367.1/LS483367.1	1	1942
TPCH-A19	SAMN14609529	PRJNA625795	GCA_012844385.1	Complete	2.10252	39.5	chromosome:NZ_CP051623.1/CP051623.1	1	1904
NCTC5370	SAMEA3542434	PRJEB6403	GCA_900474785.1	Complete	2.07995	39.6	chromosome 1:NZ_LS483318.1/LS483318.1	1	1888
STREP97-15	SAMN08943323	PRJNA450511	GCA_009650295.1	Chromosome	2.43257	39.5	chromosome:NZ_CP033166.1/CP033166.1	1	2230
DB31752-13	SAMN08943321	PRJNA450511	GCA_009650255.1	Chromosome	2.31957	39.3	chromosome:NZ_CP033164.1/CP033164.1	1	2028
DB60705-15	SAMN08943322	PRJNA450511	GCA_009650275.1	Chromosome	2.19066	39.7	chromosome:NZ_CP033165.1/CP033165.1	1	1952
FDAARGOS_1087	SAMN16357256	PRJNA231221	GCA_016766775.1	Chromosome	2.13831	39.5	chromosome:NZ_CP068478.1/CP068478.1	1	1908
SCDR-SD1	SAMN10285107	PRJNA498183	GCA_009497975.1	Chromosome	2.17914	41	chromosome:NZ_CP033391.1/CP033391.1	1	1729
NCTC13731	SAMEA4030746	PRJEB6403	GCA_900459225.1	Contig	2.1517	39.3		3	1926
NCTC11564	SAMEA3672885	PRJEB6403	GCA_900460375.1	Contig	2.43501	39.3		2	2210
NCTC10238	SAMEA3662924	PRJEB6403	GCA_901544045.1	Contig	2.39676	39.1		4	2248
NCTC13762	SAMEA3879491	PRJEB6403	GCA_900459095.1	Contig	2.2852	39.5		2	2181
NCTC10321	SAMEA3542443	PRJEB6403	GCA_901542475.1	Contig	2.24755	39.7		2	2006
NCTC11555	SAMEA3662928	PRJEB6403	GCA_901544225.1	Contig	2.27719	39.3		5	2086
NCTC6407	SAMEA3542437	PRJEB6403	GCA_901542425.1	Contig	2.23559	39.7		2	2031
NCTC4670	SAMEA3729933	PRJEB6403	GCA_900459205.1	Contig	2.25218	39.2		4	2031
NCTC8543	SAMEA3956098	PRJEB6403	GCA_900460145.1	Contig	2.17382	39.7		2	1978
NCTC13759	SAMEA53432668	PRJEB6403	GCA_900459065.1	Contig	2.15094	39.3		3	1932
NCTC4671	SAMEA3539720	PRJEB6403	GCA_900459135.1	Contig	2.123	39.3		3	1889
NCTC9603	SAMEA3662922	PRJEB6403	GCA_901543655.1	Contig	2.07676	39.6		3	1884
NCTC7982	SAMEA3632056	PRJEB6403	GCA_901543405.1	Contig	2.27715	39.7		4	2030
NCTC11557	SAMEA3662930	PRJEB6403	GCA_901544365.1	Contig	2.43084	39.1		8	2273
SDES6020	SAMN10996165	PRJNA524111	GCA_008121785.1	Contig	2.20356	39.3		221	2041
SDES6006	SAMN10996162	PRJNA524111	GCA_008121775.1	Contig	2.20336	39.2		252	2041
UT_4255RC	SAMN05327344	PRJNA327242	GCA_001704515.1	Contig	2.26866	39.1		43	2051
SDES6017	SAMN10996164	PRJNA524111	GCA_008121765.1	Contig	2.3024	39.5		283	2176
UT-SS957	SAMN03445739	PRJNA279308	GCA_000971005.1	Contig	2.03871	39.3		58	1897
ASDSE_99	SAMN05327346	PRJNA327242	GCA_001704445.1	Contig	2.24066	39.2		41	2079
UT_4966_RC	SAMN05327343	PRJNA327242	GCA_001704455.1	Contig	2.11709	39.5		64	1932
SDES6007	SAMN10996163	PRJNA524111	GCA_008121795.1	Contig	2.14566	39.5		143	1963
iSDSE355	SAMN13828845	PRJNA600655	GCA_011327345.1	Contig	2.0992	39.3		63	1926
GCH3	SAMN13089992	PRJNA579011	GCA_009380195.1	Contig	2.03728	39.3		59	1833
iSDSE324	SAMN13828842	PRJNA600655	GCA_011379605.1	Contig	2.16662	39.2		59	2012
iSDSE155	SAMN13828831	PRJNA600655	GCA_011379815.1	Scaffold	2.11607	39.1		51	1943
NT 15	SAMN15824234	PRJNA657274	GCA_016888365.1	Contig	2.11493	39.5		60	1988
UT_4234_DH	SAMN05327339	PRJNA327242	GCA_001682825.1	Contig	2.21493	39.2		62	2040
ASDSE_96	SAMN05327345	PRJNA327242	GCA_001704435.1	Contig	2.21031	39.3		81	2039
iSDSE359	SAMN13828847	PRJNA600655	GCA_011379515.1	Contig	2.07254	39.3		66	1888
iSDSE309	SAMN13828840	PRJNA600655	GCA_011379665.1	Contig	2.19236	38.9		65	2006
iSDSE333	SAMN13828843	PRJNA600655	GCA_011379555.1	Contig	2.13359	39.3		66	1950
iSDSE357	SAMN13828846	PRJNA600655	GCA_011379545.1	Contig	2.05522	39.4		62	1870
302_SDYS	SAMN03197494	PRJNA267549	GCA_001072165.1	Contig	2.025	39.3		62	1872
INFECT6037_SDSE	SAMN13634605	PRJNA524111	GCA_009847585.1	Contig	2.1273	39.2		62	1966
INFECT2027_SDSE	SAMN13634199	PRJNA524111	GCA_009848215.1	Contig	2.13243	39.2		62	1970
iSDSE167	SAMN13828832	PRJNA600655	GCA_011379805.1	Scaffold	2.12096	39.4		55	1964
iSDSE322	SAMN13828841	PRJNA600655	GCA_011379645.1	Contig	2.25884	39.4		64	2143
AKSDE4288	SAMN05449652	PRJNA19975	GCA_001704525.1	Contig	2.21755	39.2		59	2027
INFECT2086_SDSE	SAMN13634211	PRJNA524111	GCA_009847065.1	Contig	2.12592	39.3		68	1948
iSDSE207	SAMN13828834	PRJNA600655	GCA_011379765.1	Contig	2.09135	39.3		65	1899
iSDSE299	SAMN13828838	PRJNA600655	GCA_011379655.1	Contig	2.05634	39.3		67	1878
KNZ01	SAMN12206521	PRJNA552440	GCA_009389595.1	Contig	2.07792	39.4		73	1901
UT_4277_BB	SAMN05327342	PRJNA327242	GCA_001682765.1	Scaffold	2.11287	39.5		76	1956
T642	SAMN06688436	PRJNA381604	GCA_002094215.1	Scaffold	2.09561	39.2		80	1903
V 123	SAMN15824232	PRJNA657274	GCA_016888325.1	Contig	2.11004	39.5		81	2000
iSDSE230	SAMN13828836	PRJNA600655	GCA_011379715.1	Scaffold	2.09284	39.2		53	1917
B 82	SAMN15824233	PRJNA657274	GCA_016888305.1	Scaffold	2.18507	39.1		85	2071
INFECT6056_SDSE	SAMN13634610	PRJNA524111	GCA_009847535.1	Contig	2.08107	39.3		67	1903
KNZ03	SAMN12206522	PRJNA552440	GCA_009389575.1	Contig	2.15532	39.1		92	2017
UT_4231_KK	SAMN05327338	PRJNA327242	GCA_001682735.1	Contig	2.17431	39.2		72	2036
UT_4031CC	SAMN05327337	PRJNA327242	GCA_001682745.1	Contig	2.11784	39.5		81	1938
SDES5005	SAMN10996161	PRJNA524111	GCA_008121855.1	Contig	2.16453	39.2		114	2011
UT_4241_XS	SAMN05327340	PRJNA327242	GCA_001682755.1	Contig	2.05604	39.5		88	1911
iSDSE118	SAMN13828829	PRJNA600655	GCA_011379845.1	Contig	2.18122	39.1		68	2051
T201	SAMN15824235	PRJNA657274	GCA_016888375.1	Scaffold	2.51586	40.4		244	2165
iSDSE257	SAMN13828837	PRJNA600655	GCA_011379705.1	Contig	2.11673	39.2		73	1979
UT_4242_AB	SAMN05327341	PRJNA327242	GCA_001682815.1	Scaffold	2.11738	39.4		81	1969
WCHSDSE-1	SAMN03268887	PRJNA418684	GCA_001038445.1	Contig	2.08601	39.4		77	2000
iSDSE196	SAMN13828833	PRJNA600655	GCA_011379745.1	Contig	2.11407	39.2		68	1970
INFECT6065_SDSE	SAMN13634612	PRJNA524111	GCA_009847485.1	Contig	2.02648	39.5		66	1863
iSDSE305	SAMN13828839	PRJNA600655	GCA_011379625.1	Contig	2.02648	39.5		66	1873
iSDSE222	SAMN13828835	PRJNA600655	GCA_011379725.1	Contig	2.17245	39.2		89	2003
SS1575	SAMN09224878	PRJNA471295	GCA_003202195.1	Contig	2.02181	39.5		92	1890
AGF913	SAMN15659138	PRJNA649102	GCA_014893835.1	Contig	2.03106	39.6		88	1880
iSDSE140	SAMN13828830	PRJNA600655	GCA_011379825.1	Scaffold	2.10765	39.3		80	1941
INFECT5029_SDSE	SAMN13634594	PRJNA524111	GCA_009846995.1	Contig	2.24159	39.2		85	2072
INFECT5041_SDSE	SAMN13634599	PRJNA524111	GCA_009847965.1	Contig	2.11301	39.4		67	1977
iSDSE348	SAMN13828844	PRJNA600655	GCA_011379535.1	Contig	2.1104	39.2		82	1957
UT-5345	SAMN03445737	PRJNA279308	GCA_000970985.1	Contig	2.20776	39.3		91	2057
BgEED31	SAMEA5664375	PRJEB32184	GCA_901875505.1	Contig	1.95595	39.5		73	1809
KNZ10	SAMD00191547	PRJDB8919	GCA_009730835.1	Scaffold	2.05551	39.4		97	1886
KNZ15	SAMD00191549	PRJDB8919	GCA_009730875.1	Scaffold	2.09114	39.4		104	1942
KNZ07	SAMD00191546	PRJDB8919	GCA_009730815.1	Scaffold	2.04527	39.4		97	1864
KNZ06	SAMD00191545	PRJDB8919	GCA_009730795.1	Scaffold	2.1095	39.2		152	1933
KNZ16	SAMD00191550	PRJDB8919	GCA_009730895.1	Scaffold	2.16448	39.3		137	2029
KNZ12	SAMD00191548	PRJDB8919	GCA_009730855.1	Scaffold	2.09356	39.4		138	1920
KNZ04	SAMD00191544	PRJDB8919	GCA_009730775.1	Scaffold	2.16398	39.3		167	2006
ATCC 12394	SAMN02603163	PRJNA39783	GCA_000188715.1	Complete	2.15949	39.5	chromosome:CP002215.1	1	2056
167	SAMD00061054	PRJDB689	GCA_000493775.1	Complete	2.0764	39.6	chromosome 1:AP012976.1	1	2223
DB49998-05	SAMN08943320	PRJNA450511	GCA_009650235.1	Chromosome	2.17141	39.4	chromosome:CP033163.1	1	1856
ATCC 27957	SAMN02428924	PRJNA39781	GCA_000188315.1	Chromosome	2.14184	39.4	chromosome:CM001076.1	1	4214
SK1250	SAMN00621724	PRJNA65585	GCA_000221105.2	Contig	2.12251	39.6		1	2104
NCTC8547	SAMEA3614263	PRJEB6403	GCA_900460025.1	Contig	2.63296	39.4		49	2792
NCTC11565	SAMEA3696442	PRJEB6403	GCA_901542305.1	Contig	6.56655	66.6		15	6041
DB53993-17	SAMN08943324	PRJNA450511	GCA_009697195.1	Contig	2.17042	39.6		88	1966
UT-5354	SAMN03445736	PRJNA279308	GCA_000970995.1	Contig	2.07269	39.2		75	1847
C161L1	SAMEA103910974	PRJEB19910	GCA_900169605.1	Contig	2.12173	40.4		317	1972
UT-SS1069	SAMN03445738	PRJNA279308	GCA_000970975.1	Contig	2.01559	39.5		86	1743
SK1249	SAMN00621722	PRJNA64681	GCA_000214575.2	Contig	2.16037	39.5		231	2310

## Sheet: Uberys
Supplementary Table 1 : Genome Information – S. uberis
Strain	BioSample	BioProject	Assembly	Level	Size(Mb)	GC%	Replicons	Scaffolds	CDS
NCTC4672	SAMEA3539721	PRJEB6403	GCA_900460135.1	Contig	1.94213	36.7		3	1824
NCTC3858	SAMEA3871780	PRJEB6403	GCA_900475595.1	Complete	1.9756	36.6	chromosome 1:NZ_LS483397.1/LS483397.1	1	1875
NCTC4674	SAMEA3956095	PRJEB6403	GCA_900475695.1	Complete	2.02427	36.5	chromosome 1:NZ_LS483408.1/LS483408.1	1	1875
NZ01	SAMN07356854	PRJNA394615	GCA_002814135.1	Complete	1.86384	36.7	chromosome:NZ_CP022435.1/CP022435.1	1	1770
0140J	SAMEA3138207	PRJNA353	GCA_000009545.1	Complete	1.85235	36.6	chromosome:NC_012004.1/AM946015.1	1	1765
NCTC4673	SAMEA3539722	PRJEB6403	GCA_900459985.1	Contig	1.98579	36.6		3	1893
B190	SAMN02570397	PRJNA234018	GCA_000975545.1	Contig	1.88186	36.4		20	1814
C9359	SAMN02570395	PRJNA234018	GCA_000975335.1	Contig	1.83771	36.5		11	1779
C5388	SAMN02570396	PRJNA234018	GCA_000975505.1	Contig	1.8378	36.5		12	1779
C5072	SAMN02570390	PRJNA234018	GCA_000975485.1	Contig	1.9062	36.5		19	1851
EF20/0145	SAMN02570392	PRJNA234018	GCA_000975355.1	Contig	1.93304	36.3		17	1865
GCPRG114	SAMN16448103	PRJNA669385	GCA_016837485.1	Contig	1.98447	36.3		21	1920
B362	SAMN02570399	PRJNA234018	GCA_000975415.1	Contig	1.91267	36.4		31	1814
40717883	SAMN14379611	PRJNA612640	GCA_016113545.1	Contig	1.95171	36.8		17	1884
GCPRG127	SAMN16448116	PRJNA669385	GCA_016837285.1	Contig	1.90933	36.4		13	1840
GCPRG112	SAMN16448101	PRJNA669385	GCA_016837525.1	Contig	2.01976	36.2		16	1969
GCPRG111	SAMN16448100	PRJNA669385	GCA_016837565.1	Contig	1.9281	36.5		11	1878
GCPRG104	SAMN16448093	PRJNA669385	GCA_016838525.1	Contig	1.95898	36.3		17	1923
GCPRG118	SAMN16448107	PRJNA669385	GCA_016837445.1	Contig	1.92712	36.3		14	1874
GCPRG108	SAMN16448097	PRJNA669385	GCA_016838445.1	Contig	1.96212	36.6		11	1873
GCPRG125	SAMN16448114	PRJNA669385	GCA_016837305.1	Contig	1.89447	36.3		14	1846
GCPRG110	SAMN16448099	PRJNA669385	GCA_016837545.1	Contig	1.97176	36.4		10	1892
GCPRG105	SAMN16448094	PRJNA669385	GCA_016838495.1	Contig	1.8839	36.3		15	1805
GCPRG101	SAMN16448090	PRJNA669385	GCA_016837585.1	Contig	1.93928	36.1		19	1840
GCPRG115	SAMN16448104	PRJNA669385	GCA_016837455.1	Contig	1.90674	36.4		12	1826
GCPRG117	SAMN16448106	PRJNA669385	GCA_016838365.1	Contig	1.85654	36.4		14	1788
GCPRG116	SAMN16448105	PRJNA669385	GCA_016838375.1	Contig	1.96741	36.2		14	1894
GCPRG120	SAMN16448109	PRJNA669385	GCA_016837405.1	Contig	1.8453	36.4		13	1756
GCPRG121	SAMN16448110	PRJNA669385	GCA_016837385.1	Contig	1.97871	36.3		21	1926
C6344	SAMN02570389	PRJNA234018	GCA_000975435.1	Contig	1.90741	36.5		15	1853
C8329	SAMN02570393	PRJNA234018	GCA_000975495.1	Contig	1.92395	36.6		20	1877
GCPRG106	SAMN16448095	PRJNA669385	GCA_016838465.1	Contig	1.92592	36.4		11	1854
GCPRG102	SAMN16448091	PRJNA669385	GCA_016838555.1	Contig	1.90155	36.5		14	1821
Ab71	SAMN02570394	PRJNA234018	GCA_000975345.1	Contig	1.83805	36.4		12	1758
GCPRG113	SAMN16448102	PRJNA669385	GCA_016837505.1	Contig	1.93855	36.5		12	1881
GCPRG119	SAMN16448108	PRJNA669385	GCA_016838345.1	Contig	1.91992	36.5		12	1832
S6261	SAMN02570391	PRJNA234018	GCA_000975325.1	Contig	1.86825	36.5		26	1801
6736	SAMN02570400	PRJNA234018	GCA_000975445.1	Contig	1.89331	36.4		27	1833
6780	SAMN02570398	PRJNA234018	GCA_000975405.1	Contig	1.96086	36.5		26	1881
OLC4459-A8	SAMN13161436	PRJNA580504	GCA_009706955.1	Contig	1.92596	36.4		27	1827
GCPRG109	SAMN16448098	PRJNA669385	GCA_016838425.1	Contig	1.89982	36.5		16	1833
GCPRG123	SAMN16448112	PRJNA669385	GCA_016837365.1	Contig	1.83259	36.5		16	1747
GCPRG122	SAMN16448111	PRJNA669385	GCA_016837425.1	Contig	1.83255	36.5		16	1748
GCPRG103	SAMN16448092	PRJNA669385	GCA_016838545.1	Contig	1.91551	36.4		18	1833
GCPRG126	SAMN16448115	PRJNA669385	GCA_016837325.1	Contig	1.88821	36.4		20	1826
GCPRG107	SAMN16448096	PRJNA669385	GCA_016838485.1	Contig	1.88008	36.2		19	1799
OLC4459-A11	SAMN13161439	PRJNA580504	GCA_009706935.1	Contig	1.9184	36.3		25	1795
GCPRG124	SAMN16448113	PRJNA669385	GCA_016837345.1	Contig	1.92803	36.3		23	1857
OLC4459-A3	SAMN13161431	PRJNA580504	GCA_009707045.1	Contig	1.94226	36.2		35	1817
OLC4459-A9	SAMN13161437	PRJNA580504	GCA_009706905.1	Contig	1.9255	36.4		24	1828
OLC4459-A12	SAMN13161440	PRJNA580504	GCA_009706895.1	Contig	1.85379	36.5		28	1730
OLC4459-A5	SAMN13161433	PRJNA580504	GCA_009707035.1	Contig	1.95411	36.3		34	1862
OLC4459-A20	SAMN13161448	PRJNA580504	GCA_009706695.1	Contig	1.88181	36.4		28	1768
OLC4459-A10	SAMN13161438	PRJNA580504	GCA_009807055.1	Contig	1.90614	36.5		35	1779
OLC4459-A14	SAMN13161442	PRJNA580504	GCA_009706805.1	Contig	1.88357	36.4		31	1767
OLC4459-A7	SAMN13161435	PRJNA580504	GCA_009706995.1	Contig	1.9658	36.3		33	1865
OLC4459-A13	SAMN13161441	PRJNA580504	GCA_009706885.1	Contig	1.92265	36.4		35	1804
OLC4459-A15	SAMN13161443	PRJNA580504	GCA_009706845.1	Contig	1.91302	36.4		30	1822
OLC4459-A1	SAMN13161429	PRJNA580504	GCA_009707105.1	Contig	1.96721	36.4		46	1848
OLC4459-A4	SAMN13161432	PRJNA580504	GCA_009706985.1	Contig	1.93045	36.4		34	1812
OLC4459-A16	SAMN13161444	PRJNA580504	GCA_009706825.1	Contig	1.93562	36.3		35	1849
OLC4459-A2	SAMN13161430	PRJNA580504	GCA_009707085.1	Contig	1.96565	36.4		44	1853
OLC4459-A19	SAMN13161447	PRJNA580504	GCA_009706755.1	Contig	1.94167	36.5		44	1849
OLC4459-A18	SAMN13161446	PRJNA580504	GCA_009706815.1	Contig	1.91442	36.4		55	1822
OLC4459-A6	SAMN13161434	PRJNA580504	GCA_009707015.1	Contig	1.94734	36.4		47	1862
CAIM 1894	SAMN03093229	PRJNA263023	GCA_000785785.1	Contig	2.14944	36.1		96	1723
OLC4459-A21	SAMN13161449	PRJNA580504	GCA_009706705.1	Contig	1.96489	36.4		61	1892
OLC4459-A17	SAMN13161445	PRJNA580504	GCA_009706785.1	Contig	1.95764	36.5		68	1887
